# Supplementary material
Source: PubMed Central journal article supplement (PMC4869046)

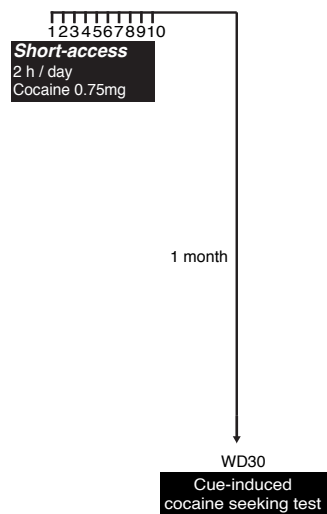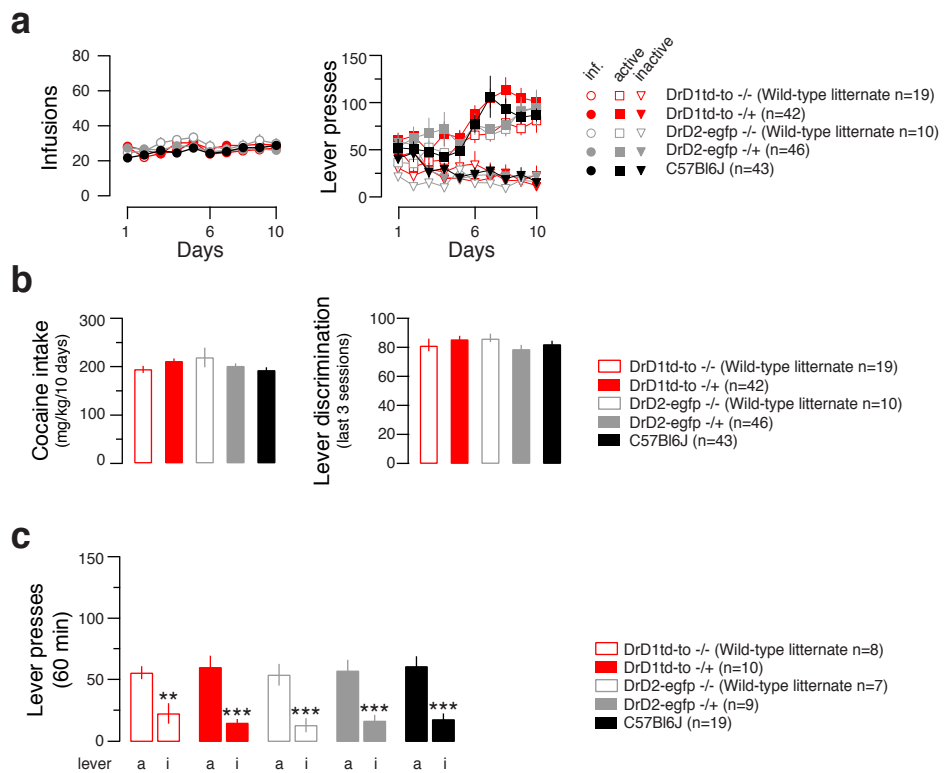

Terrier et al., Supplementary Figure 1

Supplement: npp2015345x1.pdf [file npp2015345x1.pdf]

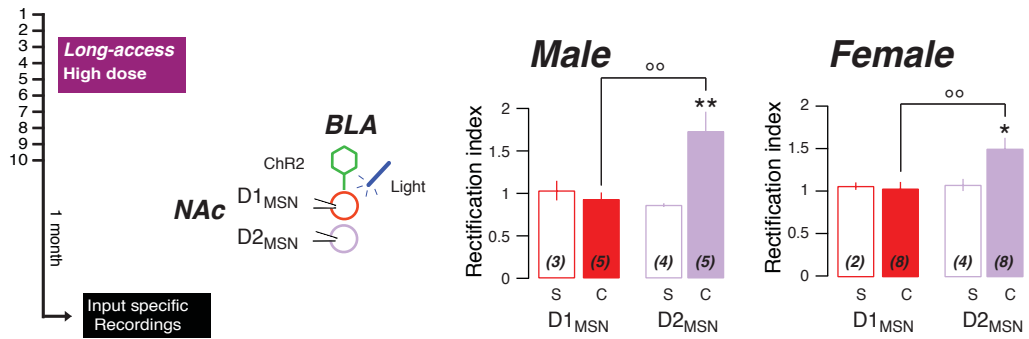

Terrier et al., Supplementary Figure 2

Supplement: npp2015345x2.pdf [file npp2015345x2.pdf]
